# Supplementary material for: Identification of Immune Activation-Related Biomarkers in Acute Myocardial Infarction (AMI) by Bioinformatic Analysis and Clinical Validation
Source: Research Square preprint supplement (doi:10.21203/rs.3.rs-1145576/v1), 2021-12-28
Supplement: Supplementary file 1 [file 6a8e2fb381ca8c5b6ae4c3cc.xlsx]

## Sheet: Sheet1
	TABLE1:	The primer sequences of genes
		Forward primer	Reverse primer
	TYROBP	TGTAAGTGATTGCAGTTGCTCT	ATACGGCCTCTGTGTGTTGA
	TLR2	ATGCCTGGCCCTCTCTACAA	CTTGGGAATGCAGCCTGTTA
	TLR4	CAAGAACCTGGACCTGAGCTTTA	GATTTGTCTCCACAGCCACCAG
	TLR8	TGGGAGAAATAGCCTCTGGG	TCAGGGGCTGGAAATCATCT
	MMP9	GCTACCACCTCG AACTTTGAC	TCAGTGAAGCGGTACATA GGG
	β-actin	TTTCCAGCCTTCCTTCTTGG	GGCATAGAGGTCTTTACGGATG
